# Supplementary material for: Comparison of HE4, CA125, ROMA and CPH-I for Preoperative Assessment of Adnexal Tumors
Source: MDPI journal article supplement (doi:10.3390/diagnostics12010226), 2022-01-17
Supplement: s1 [file s1]

## Supplementary Material

**Table S1.** ROC analysis of CA125, HE4, ROMA and CPH for diagnosis of EOC or MCO. *p*-values of the comparison between ROC curves.

| <i>Total</i>                                                  |                         |                         |                        |                        |
|---------------------------------------------------------------|-------------------------|-------------------------|------------------------|------------------------|
|                                                               | <i>CA125</i>            | <i>HE4</i>              | <i>ROMA</i>            | <i>CPH</i>             |
| <i>AUC</i>                                                    | 0.873                   | 0.909                   | 0.939                  | 0.936                  |
| <i>(95% CI)</i>                                               | (0.842–0.904)           | (0.881–0.938)           | (0.916–0.962)          | (0.913–0.958)          |
| <i>CA125</i>                                                  | -                       | 0.0294                  | 0.0000                 | 0.0000                 |
| <i>He4</i>                                                    | 0.0294                  | -                       | 0.0004                 | 0.0053                 |
| <i>ROMA</i>                                                   | 0.0000                  | 0.0004                  | -                      | 0.5994                 |
| <i>CPH</i>                                                    | 0.0000                  | 0.0053                  | 0.5994                 | -                      |
| <i>Premenopausal</i>                                          |                         |                         |                        |                        |
|                                                               | <i>CA125</i>            | <i>HE4</i>              | <i>ROMA</i>            | <i>CPH</i>             |
| <i>AUC (95% CI)</i>                                           | 0.756<br>(0.675–0.842)  | 0.863<br>(0.791–0.934)  | 0.866<br>(0.796–0.937) | 0.860<br>(0.793–0.928) |
| <i>CA125</i>                                                  | -                       | 0.0125                  | 0.0000                 | 0.0000                 |
| <i>He4</i>                                                    | 0.0125                  | -                       | 0.0005                 | 0.0057                 |
| <i>ROMA</i>                                                   | 0.0000                  | 0.0005                  | -                      | 0.6118                 |
| <i>CPH</i>                                                    | 0.0000                  | 0.0057                  | 0.6118                 | -                      |
| <i>Postmenopausal</i>                                         |                         |                         |                        |                        |
|                                                               | <i>CA125</i>            | <i>HE4</i>              | <i>ROMA</i>            | <i>CPH</i>             |
| <i>AUC (95% CI)</i>                                           | 0.933<br>(0.907–0.959)  | 0.905<br>(0.870–0.940)  | 0.956<br>(0.937–0.975) | 0.955<br>(0.935–0.975) |
| <i>CA125</i>                                                  | -                       | 0.1569                  | 0.0075                 | 0.0310                 |
| <i>HE4</i>                                                    | 0.1569                  | -                       | 0.0001                 | 0.0001                 |
| <i>ROMA</i>                                                   | 0.0075                  | 0.0001                  | -                      | 0.3882                 |
| <i>CPH</i>                                                    | 0.0310                  | 0.0001                  | 0.3882                 | -                      |
| <i>Inconclusive ultrasound according to IOTA simple rules</i> |                         |                         |                        |                        |
|                                                               | <i>CA125</i>            | <i>HE4</i>              | <i>ROMA</i>            | <i>CPH</i>             |
| <i>AUC (95% CI)</i>                                           | 0.810<br>(0.743–0.877)  | 0.844<br>(0.779–0.910)  | 0.893<br>(0.846–0.941) | 0.876<br>(0.822–0.931) |
| <i>CA125</i>                                                  | -                       | 0.3863                  | 0.0005                 | 0.0037                 |
| <i>HE4</i>                                                    | 0.3863                  | -                       | 0.0316                 | 0.1399                 |
| <i>ROMA</i>                                                   | 0.0005                  | 0.0316                  | -                      | 0.0344                 |
| <i>CPH</i>                                                    | 0.0037                  | 0.1399                  | 0.0344                 | -                      |
| <i>Stage I EOC</i>                                            |                         |                         |                        |                        |
|                                                               | <i>CA125</i>            | <i>HE4</i>              | <i>ROMA</i>            | <i>CPH</i>             |
| <i>AUC (95% CI)</i>                                           | 0.810<br>(0.751–0.869)) | 0.856<br>(0.793–0.8869) | 0.909<br>(0.863–0.955) | 0.901<br>(0.855–0.947) |
| <i>CA125</i>                                                  | -                       | 0.2410                  | 0.0014                 | 0.0001                 |
| <i>HE4</i>                                                    | 0.2410                  | -                       | 0.0099                 | 0.0572                 |
| <i>ROMA</i>                                                   | 0.0014                  | 0.0099                  | -                      | 0.6415                 |
| <i>CPH</i>                                                    | 0.0001                  | 0.0572                  | 0.6415                 | -                      |

**Table S2.** False negative results for tumor markers and probabilistic indexes.

|                                       | <i>CA125</i> | <i>HE4</i>  | <i>ROMA</i> | <i>CPH</i>  |
|---------------------------------------|--------------|-------------|-------------|-------------|
| <i>Total</i>                          | 53 (100%)    | 38(100%)    | 8 (100%)    | 20 (100%)   |
| <i>Serous carcinoma</i>               | 27 (50.94%)  | 16 (42.11%) | 3 (37.50%)  | 6 (30.00%)  |
| <i>Endometrioid carcinoma</i>         | 14 (26.42%)  | 8 (21.05%)  | 2 (25.00%)  | 7 (35.00%)  |
| <i>Mucinous carcinoma</i>             | 2 (3.77%)    | 5 (13.06%)  | 3 (37.50%)  | 3 (15.00%)  |
| <i>Clear cell carcinoma</i>           | 10 (18.87%)  | 9 (23.68%)  | 0 (0.00%)   | 4 (20.00%)  |
| <i>Undifferentiated</i>               | 6 (11.32%)   | 6 (15.79%)  | 2 (25.00%)  | 4 (20.00%)  |
| <i>Metastatic cancer in the ovary</i> | 12 (22.64%)  | 15 (39.47%) | 7 (87.50%)  | 10 (50.00%) |
